# Supplementary material for: Quality Control of Bacterial Extracellular Vesicles with Total Protein Content Assay, Nanoparticles Tracking Analysis, and Capillary Electrophoresis
Source: MDPI journal article supplement (doi:10.3390/ijms23084347), 2022-04-14
Supplement: s1 [file s1]

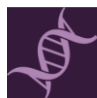

Article

# Quality Control of Bacterial Extracellular Vesicles with Total Protein Content Assay, Nanoparticles Tracking Analysis, and Capillary Electrophoresis

Aleksandra Steć <sup>1</sup>, Joanna Jońca <sup>2</sup>, Krzysztof Waleron <sup>2</sup>, Małgorzata Waleron <sup>3</sup>, Agata Płoska <sup>4</sup>, Leszek Kalinowski <sup>4,5</sup>, Bartosz Wielgomas <sup>1</sup> and Szymon Dziomba <sup>1,\*</sup>

<sup>1</sup> Department of Toxicology, Faculty of Pharmacy, Medical University of Gdansk, 107 Hallera Street, 80-416 Gdansk, Poland; aleksandra.stec@gumed.edu.pl (A.S.); bartosz.wielgomas@gumed.edu.pl (B.W.)

<sup>2</sup> Department of Pharmaceutical Microbiology, Faculty of Pharmacy, Medical University of Gdansk, 107 Hallera Street, 80-416 Gdansk, Poland; joanna.jonca@gumed.edu.pl (J.J.); krzysztof.waleron@gumed.edu.pl (K.W.)

<sup>3</sup> Laboratory of Plant Protection and Biotechnology, Intercollegiate Faculty of Biotechnology UG and MUG, 58 Abrahama Street, 80-307 Gdansk, Poland; malgorzata.waleron@biotech.ug.edu.pl

<sup>4</sup> Department of Medical Laboratory Diagnostics—Fahrenheit Biobank BBMRI.pl, Faculty of Pharmacy, Medical University of Gdansk, 7 Debinki Street, 80-211 Gdansk, Poland; szejffler@gumed.edu.pl (A.P.); leszek.kalinowski@gumed.edu.pl (L.K.)

<sup>5</sup> BioTechMed Centre, Department of Mechanics of Materials and Structures, Gdansk University of Technology, Narutowicza Street 11/12, 80-233 Gdańsk, Poland

\* Correspondence: szymon.dziomba@gumed.edu.pl

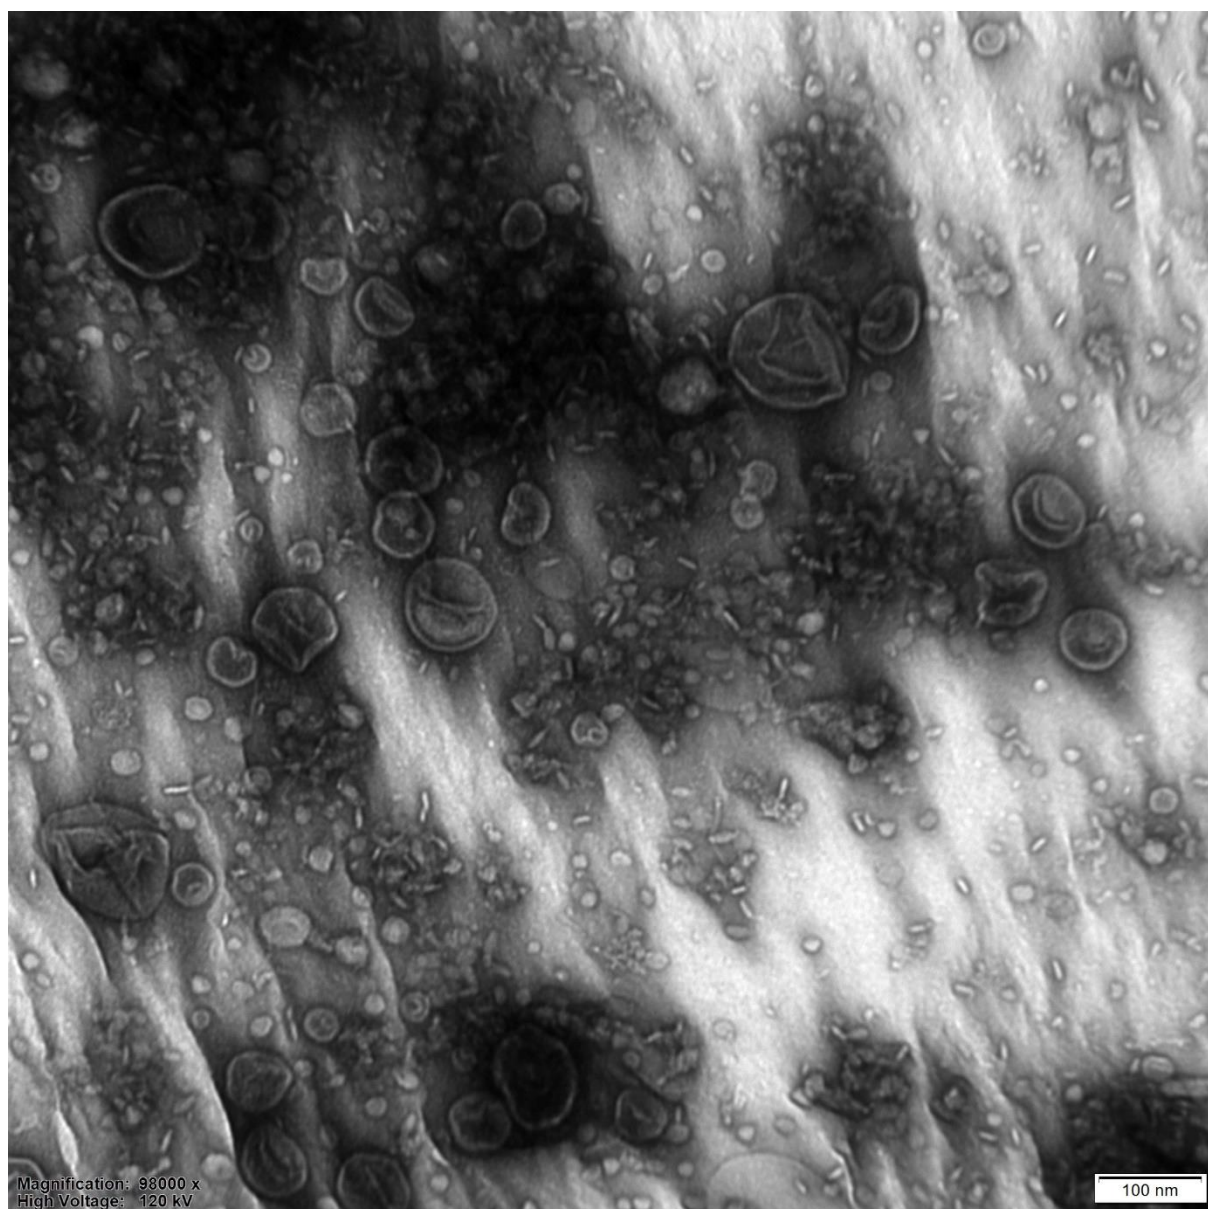

**Figure S1.** The TEM image of the isolate obtained from *Pectobacterium zantedeschiae* 9M culture using direct UC.

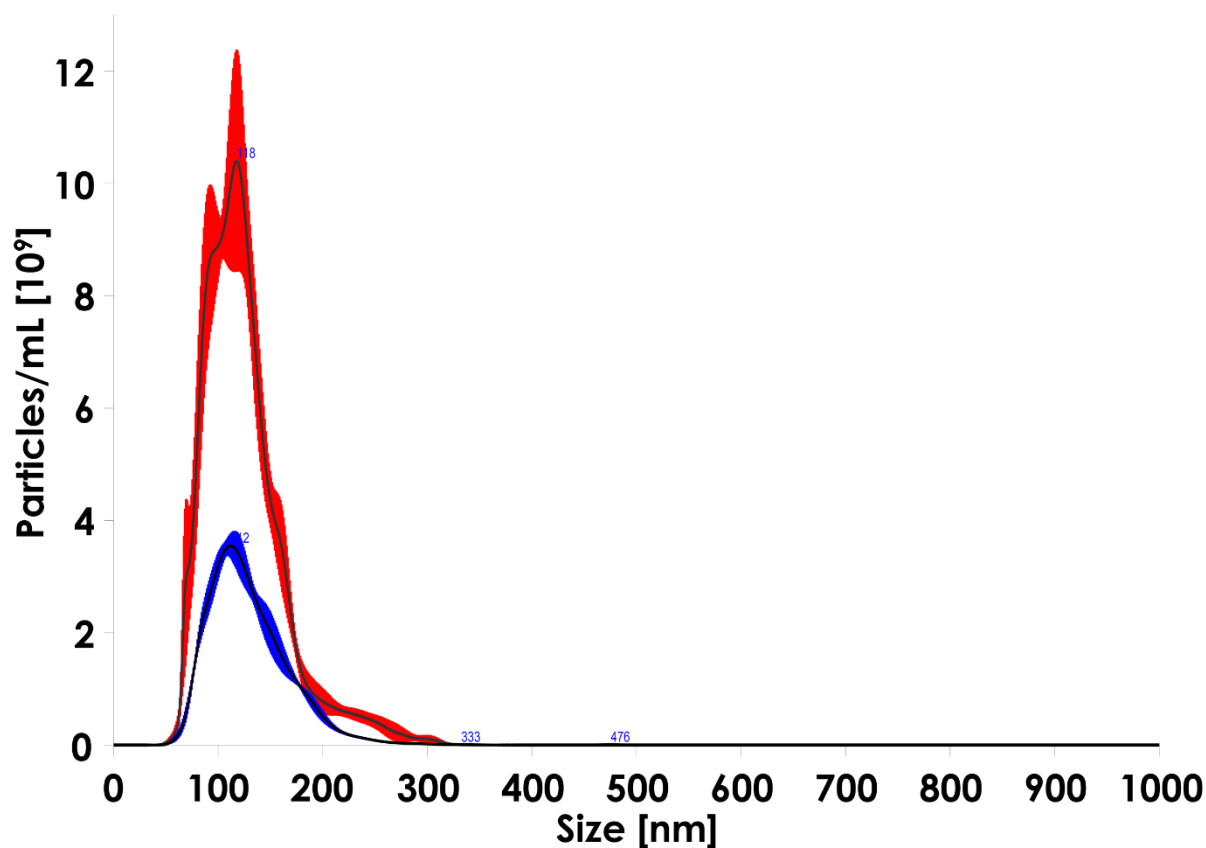

**Figure S2.** The NTA of isolates of EVs obtained from *Pectobacterium* sp. using (blue trace) direct UC and (red trace) ICUC method.

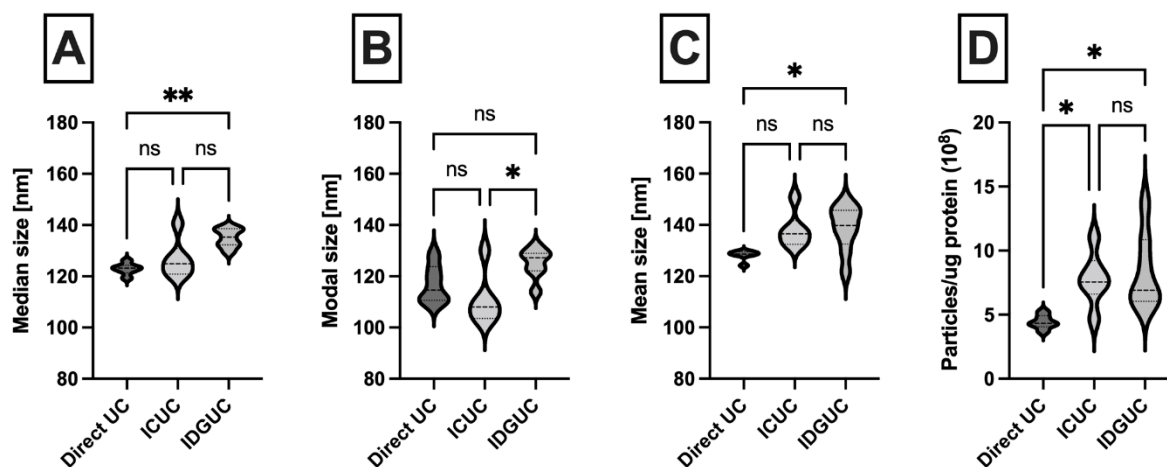

**Figure S3.** Effect of isolation protocols on (A) median, (B) modal, (C) mean size, and (D) particles/μg protein ratio in isolates of EVs of *Pectobacterium* sp. Kruskal-Wallis test, \*  $p < 0.05$ , \*\*  $p < 0.01$ .

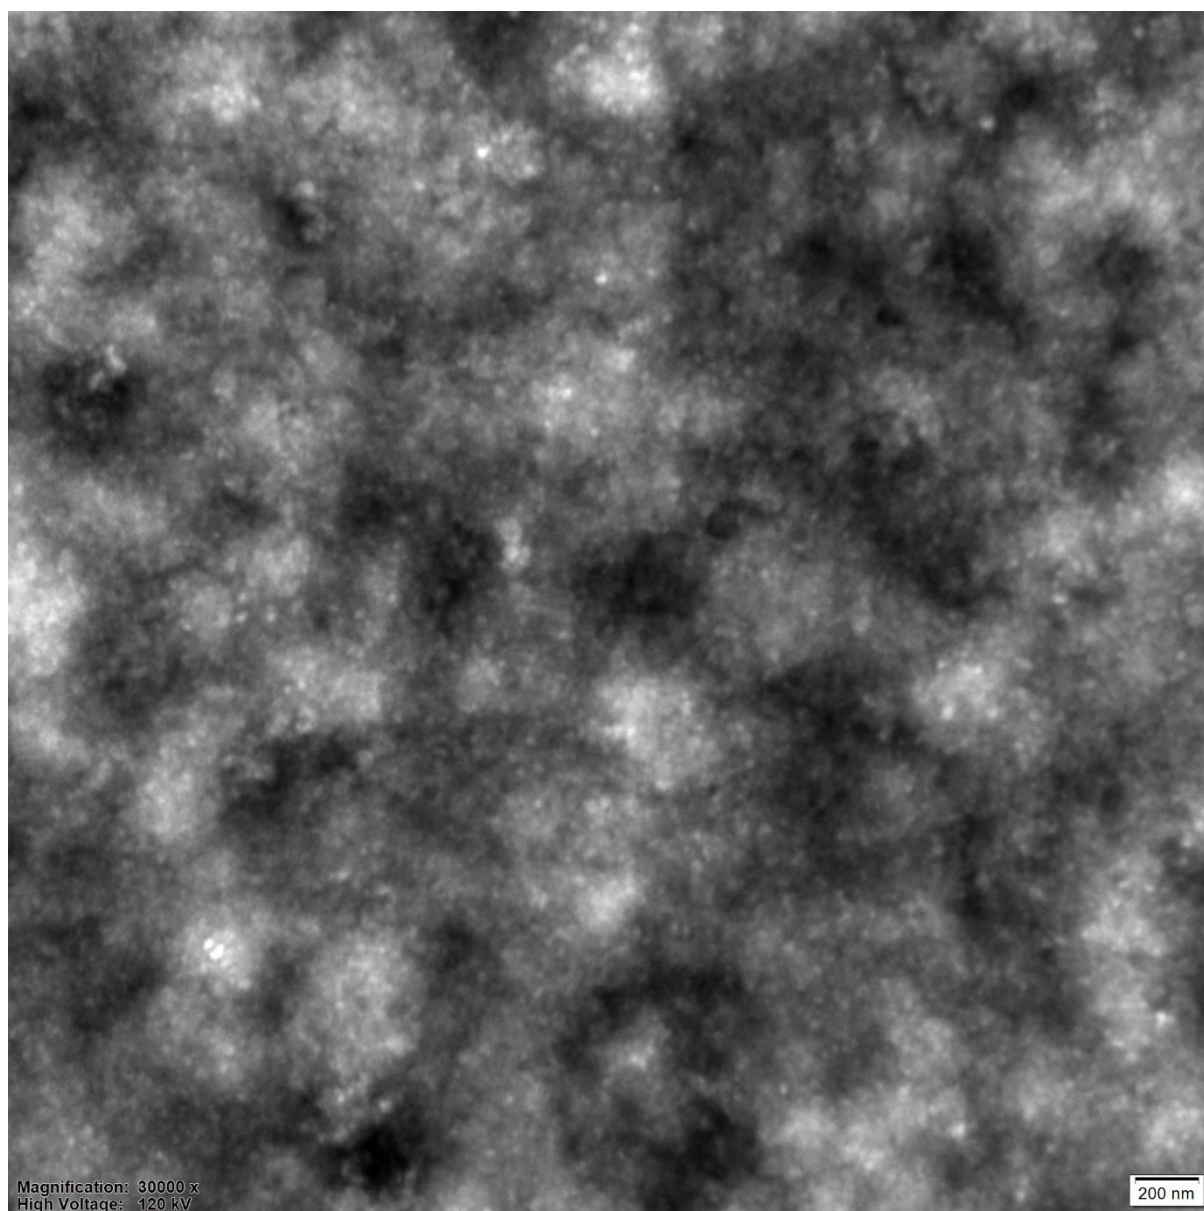

**Figure S4.** The TEM image of the isolate obtained from M63 medium supplemented with 0.2% glycerol and 0.4% PGA (no vesicular structures were observed).

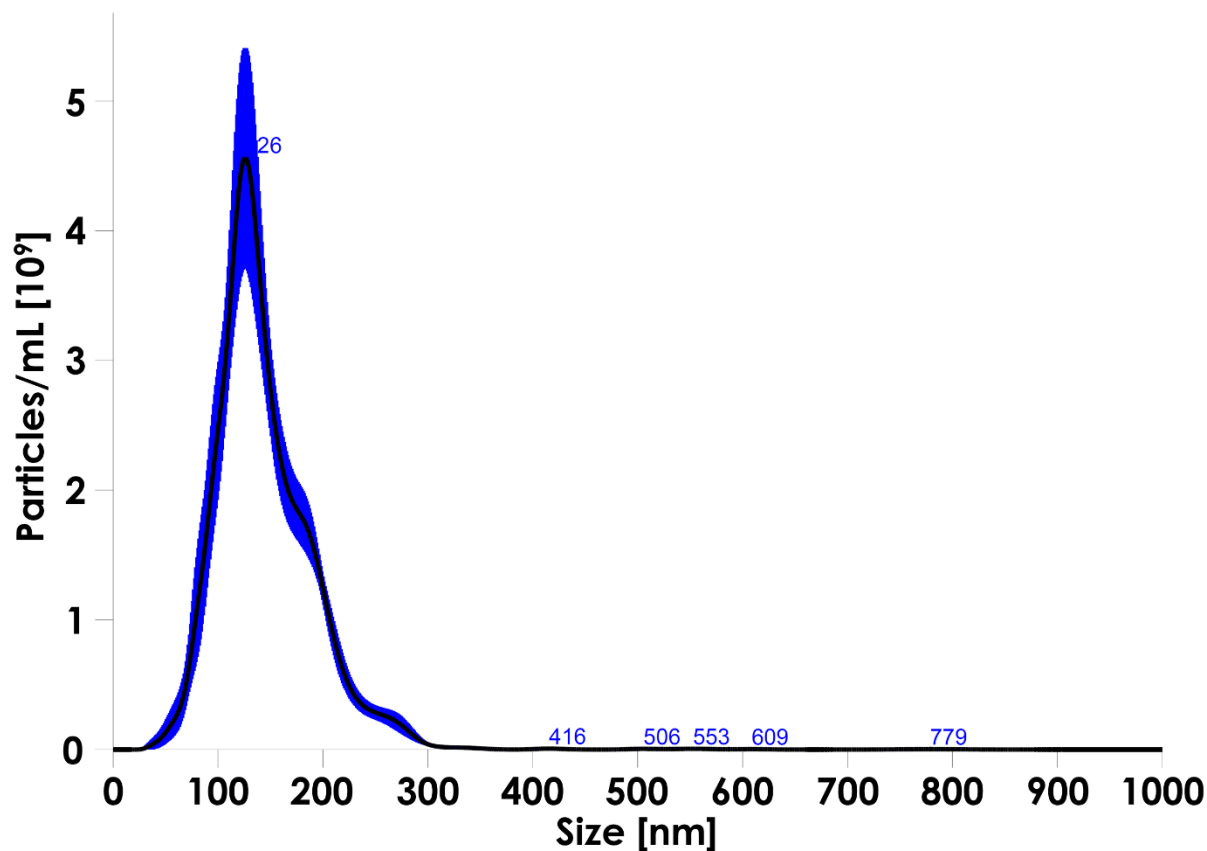

**Figure S5.** The NTA of the isolate of EVs obtained from *Pectobacterium* sp. using the IDGUC method (Fraction 3).

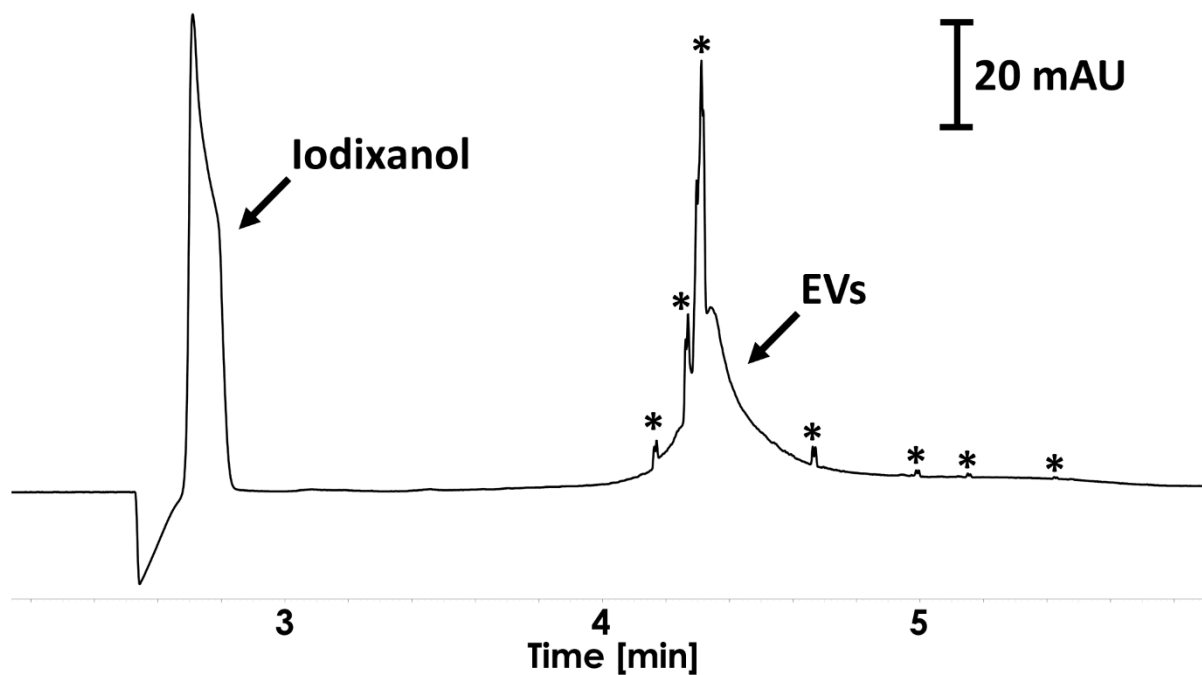

**Figure S6.** The exemplary CE analysis of low-quality isolate of EVs obtained from *Pectobacterium odoriferum* Car1 culturing medium with ICUC protocol. Asterisks indicate impurities.



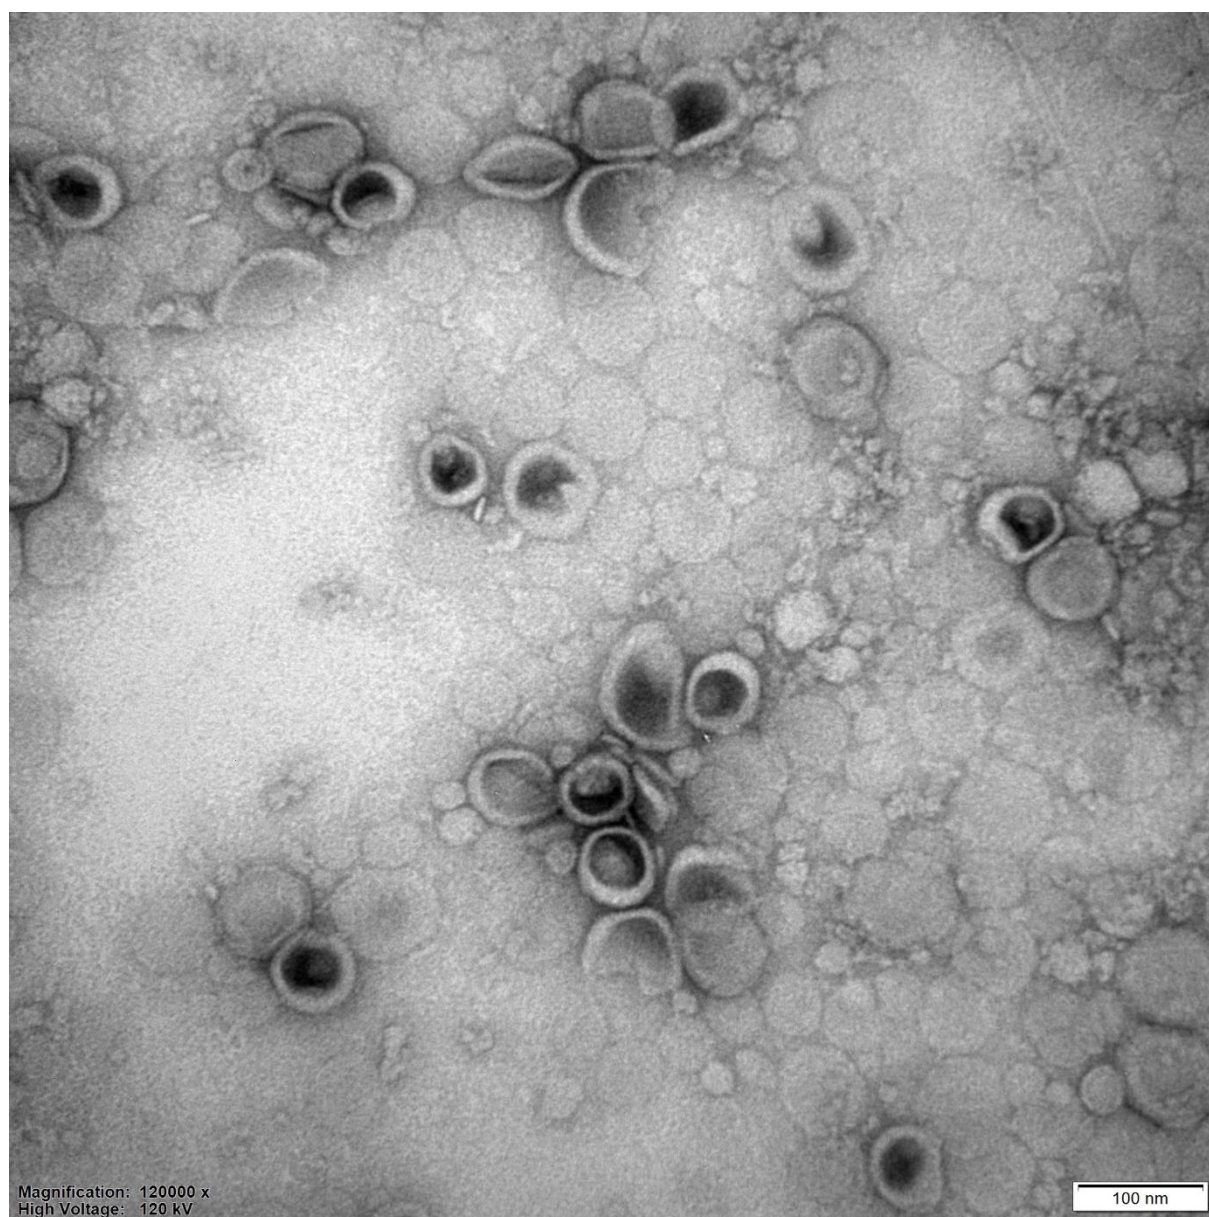

**Figure S7.** The TEM image of the 9<sup>th</sup> fraction isolated with the IDGUC method.
